# Supplementary material for: CrXY (X/Y = S, Se, Te) monolayers as efficient anode materials for Li and Na-ion batteries: a first-principles study
Source: Royal Society of Chemistry journal article supplement (doi:10.1039/d3ra04781d), 2024-01-01
Supplement: d3ra04781d1.pdf [file d3ra04781d1.pdf]

## Supporting Information

CrXY(X/Y = S, Se, Te ) Monolayers as Efficient Anode Material for Li and Na-  
Ion Batteries: A First-Principles Study

Shubham Sahoo<sup>1</sup>, Puja Kumari<sup>1</sup>, and Soumya Jyoti Ray<sup>1</sup>

<sup>1</sup>Department of Physics, Indian Institute of Technology Patna, Bihar, India-  
801106

E-mail: ray@iitp.ac.in

**Table S1 :** Total energy of janus monolayer with and without DFT-D3 (dispersion)

| Janus monolayer | Total energy without DFT – D3 method (eV) | Total energy with DFT –D3 Method (eV) |
|-----------------|-------------------------------------------|---------------------------------------|
| CrSSe           | -24317.06                                 | -24319.32                             |
| CrSTe           | -22534.29                                 | -22536.67                             |
| CeSeTe          | -34526.41                                 | -34529.01                             |

**Table S2:** Adsorption energy(  $E_g$ ) with and without DFT-D3 (dispersion)

| Janus monolayer | $E_g$ Li (eV) with DFT-D3 | $E_g$ Li (eV) without DFT-D3 | $E_g$ Na (eV) with DFT-D3 | $E_g$ Na (eV) without DFT-D3 |
|-----------------|---------------------------|------------------------------|---------------------------|------------------------------|
| CrSeTe          | -2.23                     | -2.01                        | -1.67                     | -1.38                        |

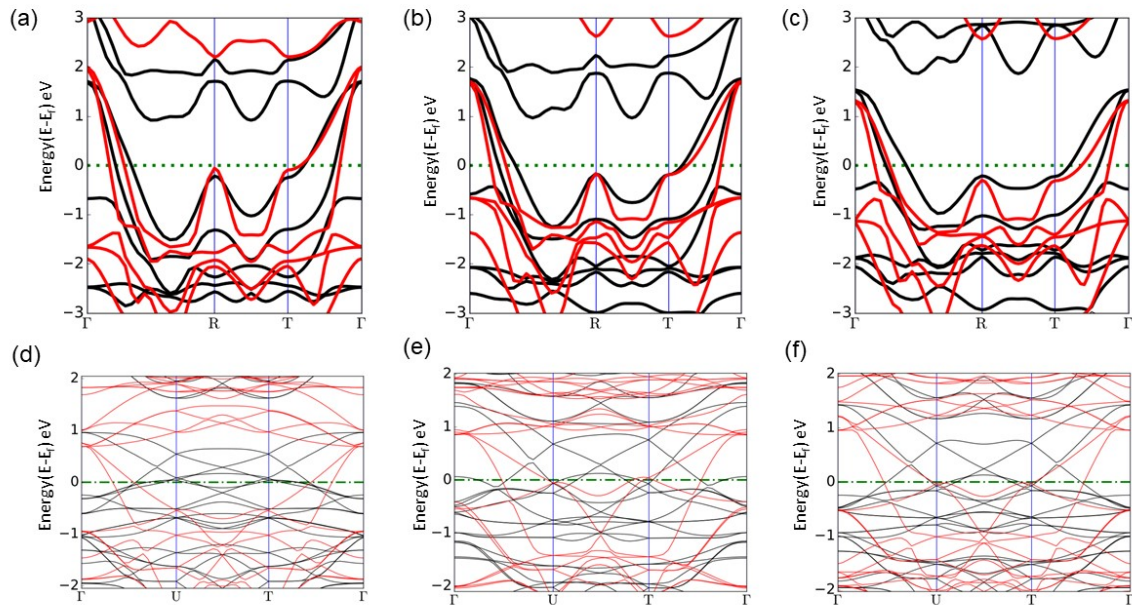

**Fig S1:** (a) (b), (c) Band structure of CrSSe, CrSTe and CrSeTe with PBE functional, (d), (e) and (f) band structure of CrSSe, CrSTe and CrSeTe with HSE functional

**Table S3:** Band gap of Janus monolayer and Adsorption energy( $E_g$ ) of Li and Na on H site with PBE and HSE functional

| Janus Monolayer | HSE Bandgap $E_g$ (eV) | PBE Bandgap(eV) | $E_g$ (Li) by HSE (eV) | $E_g$ (Li) by PBE (eV) | $E_g$ (Na) by HSE (eV) | $E_g$ (Na) by PBE(eV) |
|-----------------|------------------------|-----------------|------------------------|------------------------|------------------------|-----------------------|
| CrSSe           | 0                      | 0               | -1.93                  | -1.86                  | -1.09                  | -1.01                 |
| CrSTe           | 0                      | 0               | -1.72                  | -1.66                  | -1.28                  | -1.20                 |
| CrSeTe          | 0                      | 0               | -2.23                  | -2.15                  | -1.67                  | -1.56                 |

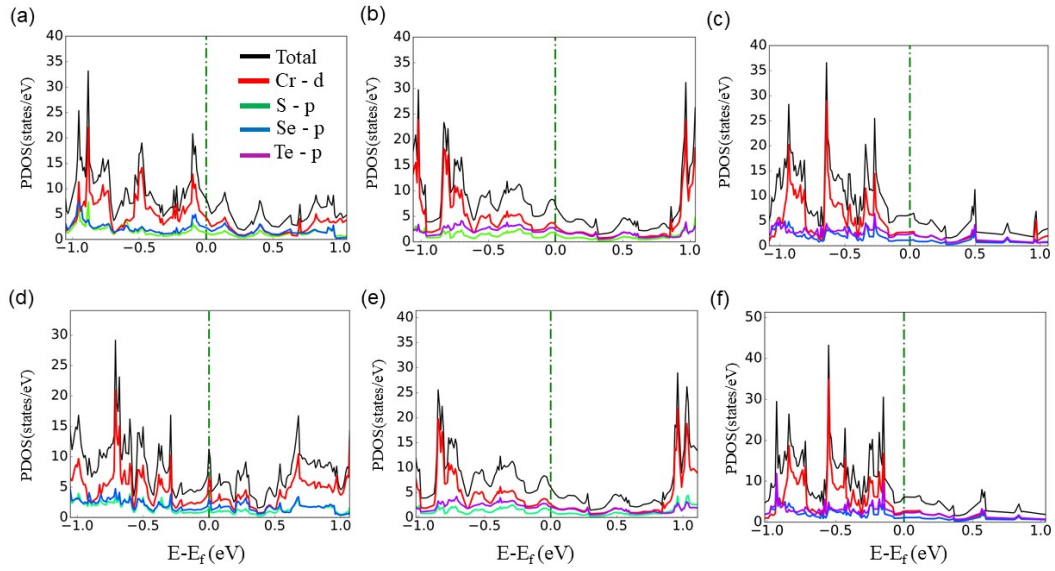

**Fig S2 :**(a) (b), (c) PDOS of CrSSe, CrSTe and CrSeTe with PBE with Fermi-Dirac occupation, (d), (e) and (f) PDOS of CrSSe, CrSTe and CrSeTe with Methfessel-Paxton

**Table S4:** Band gap and adsorption energy at different lattice constant

| Janus CrSSe at lattice constant c (Å) | Bandgap (eV) | Adsorption energy of Li (eV) | Adsorption energy of Na (eV) |
|---------------------------------------|--------------|------------------------------|------------------------------|
| 15                                    | 0            | -1.8601                      | -1.01004                     |
| 17                                    | 0            | -1.8600                      | -1.01004                     |
| 20                                    | 0            | -1.8601                      | -1.01003                     |

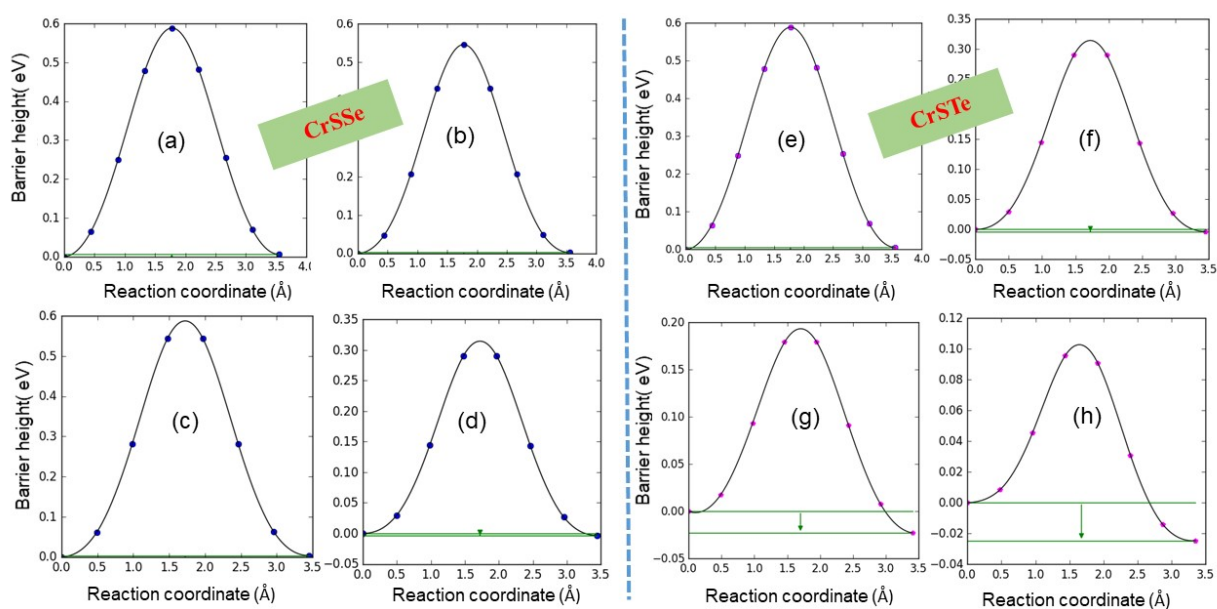

**Fig S3:** (a),(b) and (c), (d) Diffusion barrier of Li and Na above S layer and below Se layer for CrSSe monolayer respectively. (e),(f) and (g), (h) Diffusion barrier of Li and Na above S layer and below Te layer for CrSTe monolayer respectively

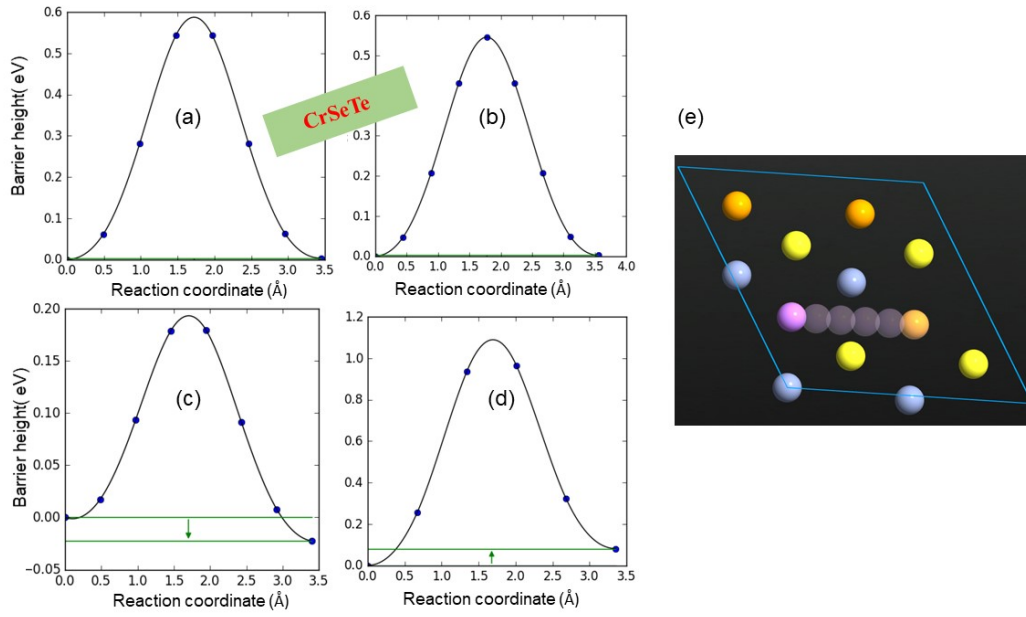

**Fig S4:** (a),(b) and (c), (d) Diffusion barrier of Li and Na above Se layer and below Te layer for CrSeTe monolayer respectively, (e) schematic of the diffusion path
